# Supplementary material for: Molecular Structures and Redox Properties of Homoleptic Aluminum(III) Complexes with Azobisphenolate (azp) Ligands
Source: MDPI journal article supplement (doi:10.3390/inorganics10060084), 2022-06-16

## checkCIF/PLATON report

Structure factors have been supplied for datablock(s) TPP\_Al\_azpMe2\_90K

THIS REPORT IS FOR GUIDANCE ONLY. IF USED AS PART OF A REVIEW PROCEDURE FOR PUBLICATION, IT SHOULD NOT REPLACE THE EXPERTISE OF AN EXPERIENCED CRYSTALLOGRAPHIC REFEREE.

No syntax errors found.      CIF dictionary      Interpreting this report

### Datablock: TPP\_Al\_azpMe2\_90K

---

Bond precision:      C-C = 0.0046 Å      Wavelength=0.71073

Cell:                      a=11.8738 (19)                      b=13.224 (2)                      c=16.406 (3)  
                             alpha=81.934 (2)                      beta=81.586 (2)                      gamma=64.230 (2)  
Temperature:              90 K

|                        | Calculated                                | Reported           |
|------------------------|-------------------------------------------|--------------------|
| Volume                 | 2286.4 (7)                                | 2286.4 (6)         |
| Space group            | P -1                                      | P -1               |
| Hall group             | -P 1                                      | -P 1               |
| Moiety formula         | C28 H24 Al N4 O4, C24 H20<br>P, C H4 O, O | ?                  |
| Sum formula            | C53 H48 Al N4 O6 P                        | C53 H48 Al N4 O6 P |
| Mr                     | 894.90                                    | 894.93             |
| Dx, g cm <sup>-3</sup> | 1.300                                     | 1.300              |
| Z                      | 2                                         | 2                  |
| Mu (mm <sup>-1</sup> ) | 0.136                                     | 0.136              |
| F000                   | 940.0                                     | 940.0              |
| F000'                  | 940.71                                    |                    |
| h, k, lmax             | 15, 16, 20                                | 15, 16, 20         |
| Nref                   | 9688                                      | 9378               |
| Tmin, Tmax             | 0.973, 0.984                              | 0.970, 0.990       |
| Tmin'                  | 0.960                                     |                    |

Correction method= # Reported T Limits: Tmin=0.970 Tmax=0.990  
AbsCorr = ?

Data completeness= 0.968      Theta(max)= 26.730

|                                |                                     |
|--------------------------------|-------------------------------------|
| R(reflections)= 0.0703 ( 7563) | wR2(reflections)=<br>0.2036 ( 9378) |
| S = 1.039                      | Npar= 739                           |

---

The following ALERTS were generated. Each ALERT has the format

**test-name\_ALERT\_alert-type\_alert-level.**

Click on the hyperlinks for more details of the test.

---

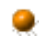

#### Alert level B

PLAT097\_ALERT\_2\_B Large Reported Max. (Positive) Residual Density 1.87 eA-3

**Author Response: The structure refinement is converged using the composition determined by the elemental analysis. Further assignment of electron density was not performed.**

PLAT306\_ALERT\_2\_B Isolated Oxygen Atom (H-atoms Missing ?) ..... 07 Check

**Author Response: The oxygen atom is an isolated water molecule.**

---

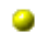

#### Alert level C

DIFMX02\_ALERT\_1\_C The maximum difference density is > 0.1\*ZMAX\*0.75

The relevant atom site should be identified.

|                                                                    |         |             |
|--------------------------------------------------------------------|---------|-------------|
| PLAT029_ALERT_3_C _diffrn_measured_fraction_theta_full value Low . | 0.968   | Why?        |
| PLAT052_ALERT_1_C Info on Absorption Correction Method Not Given   |         | Please Do ! |
| PLAT094_ALERT_2_C Ratio of Maximum / Minimum Residual Density .... | 2.28    | Report      |
| PLAT241_ALERT_2_C High 'MainMol' Ueq as Compared to Neighbors of   | 01      | Check       |
| PLAT241_ALERT_2_C High 'MainMol' Ueq as Compared to Neighbors of   | 02      | Check       |
| PLAT260_ALERT_2_C Large Average Ueq of Residue Including           | 07      | 0.203 Check |
| PLAT340_ALERT_3_C Low Bond Precision on C-C Bonds .....            | 0.00461 | Ang.        |
| PLAT414_ALERT_2_C Short Intra D-H..H-X H53B ..H105 .               | 1.93    | Ang.        |
|                                                                    | x,y,z = | 1_555 Check |
| PLAT906_ALERT_3_C Large K Value in the Analysis of Variance .....  | 2.083   | Check       |
| PLAT911_ALERT_3_C Missing FCF Refl Between Thmin & STh/L=          | 0.600   | 177 Report  |
| PLAT918_ALERT_3_C Reflection(s) with I(obs) much Smaller I(calc) . |         | 1 Check     |
| PLAT971_ALERT_2_C Check Calcd Resid. Dens. 1.91Ang From 07         | 1.80    | eA-3        |
| PLAT975_ALERT_2_C Check Calcd Resid. Dens. 1.00Ang From 07 .       | 1.42    | eA-3        |
| PLAT975_ALERT_2_C Check Calcd Resid. Dens. 0.76Ang From 07 .       | 1.41    | eA-3        |
| PLAT976_ALERT_2_C Check Calcd Resid. Dens. 0.40Ang From 07 .       | -0.82   | eA-3        |
| PLAT976_ALERT_2_C Check Calcd Resid. Dens. 0.48Ang From 07 .       | -0.79   | eA-3        |
| PLAT976_ALERT_2_C Check Calcd Resid. Dens. 0.63Ang From 05 .       | -0.61   | eA-3        |
| PLAT976_ALERT_2_C Check Calcd Resid. Dens. 0.63Ang From 07 .       | -0.56   | eA-3        |
| PLAT992_ALERT_5_C Repd & Actual _reflns_number_gt Values Differ by | 23      | Check       |

---

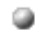

#### Alert level G

|                                                                    |       |        |
|--------------------------------------------------------------------|-------|--------|
| PLAT002_ALERT_2_G Number of Distance or Angle Restraints on AtSite | 32    | Note   |
| PLAT003_ALERT_2_G Number of Uiso or Uij Restrained non-H Atoms ... | 81    | Report |
| PLAT007_ALERT_5_G Number of Unrefined Donor-H Atoms .....          | 1     | Report |
| PLAT066_ALERT_1_G Predicted and Reported Tmin&Tmax Range Identical | ?     | Check  |
| PLAT072_ALERT_2_G SHELXL First Parameter in WGHT Unusually Large   | 0.10  | Report |
| PLAT154_ALERT_1_G The s.u.'s on the Cell Angles are Equal ..(Note) | 0.002 | Degree |
| PLAT175_ALERT_4_G The CIF-Embedded .res File Contains SAME Records | 2     | Report |
| PLAT176_ALERT_4_G The CIF-Embedded .res File Contains SADI Records | 7     | Report |

|                   |                                                  |     |              |
|-------------------|--------------------------------------------------|-----|--------------|
| PLAT178_ALERT_4_G | The CIF-Embedded .res File Contains SIMU Records | 2   | Report       |
| PLAT186_ALERT_4_G | The CIF-Embedded .res File Contains ISOR Records | 1   | Report       |
| PLAT232_ALERT_2_G | Hirshfeld Test Diff (M-X) All --01 .             | 6.3 | s.u.         |
| PLAT301_ALERT_3_G | Main Residue Disorder .....(Resd 1 )             | 43% | Note         |
| PLAT720_ALERT_4_G | Number of Unusual/Non-Standard Labels .....      | 3   | Note         |
| PLAT767_ALERT_4_G | INS Embedded LIST 6 Instruction Should be LIST 4 |     | Please Check |
| PLAT802_ALERT_4_G | CIF Input Record(s) with more than 80 Characters | 1   | Info         |
| PLAT860_ALERT_3_G | Number of Least-Squares Restraints .....         | 887 | Note         |
| PLAT883_ALERT_1_G | No Info/Value for _atom_sites_solution_primary . |     | Please Do !  |
| PLAT910_ALERT_3_G | Missing # of FCF Reflection(s) Below Theta(Min). | 3   | Note         |
| PLAT912_ALERT_4_G | Missing # of FCF Reflections Above STh/L= 0.600  | 131 | Note         |
| PLAT941_ALERT_3_G | Average HKL Measurement Multiplicity .....       | 1.3 | Low          |
| PLAT978_ALERT_2_G | Number C-C Bonds with Positive Residual Density. | 6   | Info         |

---

0 **ALERT level A** = Most likely a serious problem - resolve or explain  
 2 **ALERT level B** = A potentially serious problem, consider carefully  
 20 **ALERT level C** = Check. Ensure it is not caused by an omission or oversight  
 21 **ALERT level G** = General information/check it is not something unexpected

5 ALERT type 1 CIF construction/syntax error, inconsistent or missing data  
 19 ALERT type 2 Indicator that the structure model may be wrong or deficient  
 9 ALERT type 3 Indicator that the structure quality may be low  
 8 ALERT type 4 Improvement, methodology, query or suggestion  
 2 ALERT type 5 Informative message, check

---

It is advisable to attempt to resolve as many as possible of the alerts in all categories. Often the minor alerts point to easily fixed oversights, errors and omissions in your CIF or refinement strategy, so attention to these fine details can be worthwhile. In order to resolve some of the more serious problems it may be necessary to carry out additional measurements or structure refinements. However, the purpose of your study may justify the reported deviations and the more serious of these should normally be commented upon in the discussion or experimental section of a paper or in the "special\_details" fields of the CIF. checkCIF was carefully designed to identify outliers and unusual parameters, but every test has its limitations and alerts that are not important in a particular case may appear. Conversely, the absence of alerts does not guarantee there are no aspects of the results needing attention. It is up to the individual to critically assess their own results and, if necessary, seek expert advice.

### **Publication of your CIF in IUCr journals**

A basic structural check has been run on your CIF. These basic checks will be run on all CIFs submitted for publication in IUCr journals (*Acta Crystallographica*, *Journal of Applied Crystallography*, *Journal of Synchrotron Radiation*); however, if you intend to submit to *Acta Crystallographica Section C* or *E* or *IUCrData*, you should make sure that full publication checks are run on the final version of your CIF prior to submission.

### **Publication of your CIF in other journals**

Please refer to the *Notes for Authors* of the relevant journal for any special instructions relating to CIF submission.

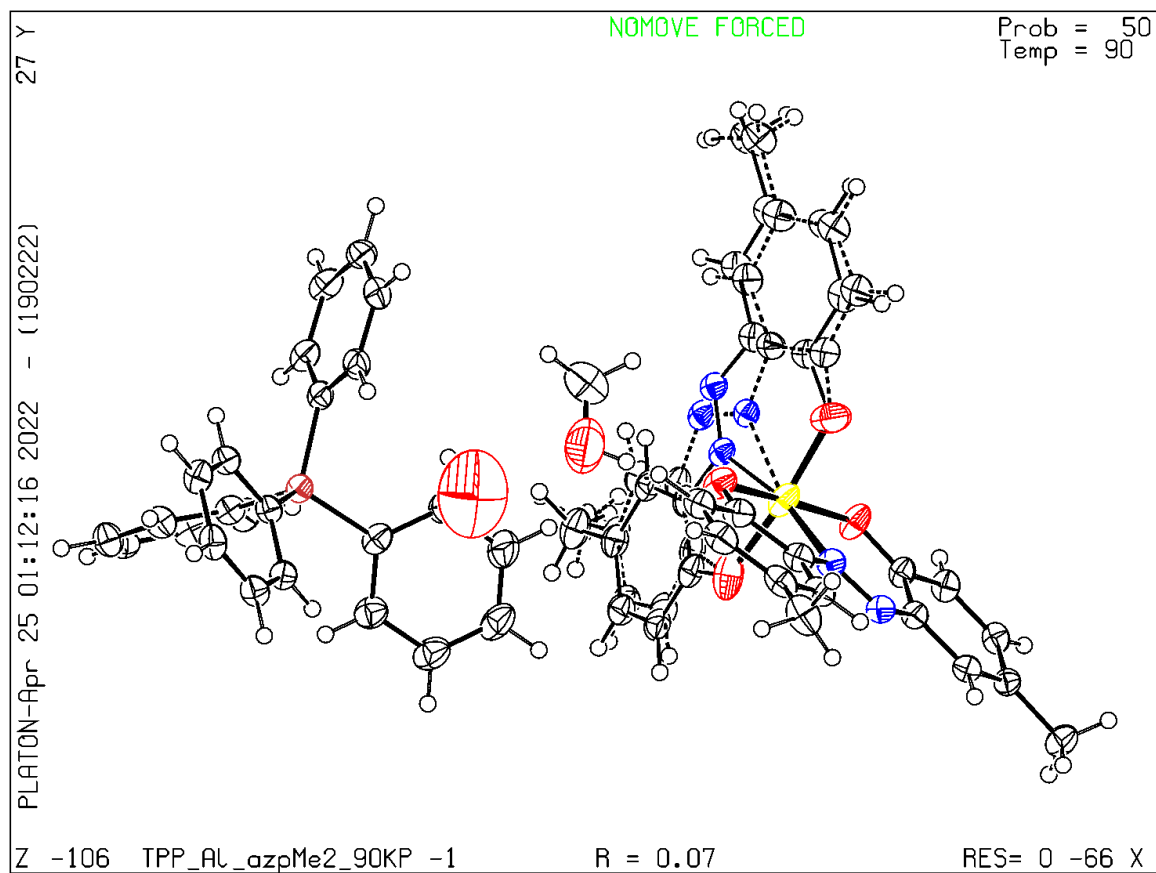

Supplement: s1 [file s1]
