# Supplementary material for: Molecular Structures and Redox Properties of Homoleptic Aluminum(III) Complexes with Azobisphenolate (azp) Ligands
Source: MDPI journal article supplement (doi:10.3390/inorganics10060084), 2022-06-16

## checkCIF/PLATON report

Structure factors have been supplied for datablock(s) TPP\_Al\_phsalMe2

THIS REPORT IS FOR GUIDANCE ONLY. IF USED AS PART OF A REVIEW PROCEDURE FOR PUBLICATION, IT SHOULD NOT REPLACE THE EXPERTISE OF AN EXPERIENCED CRYSTALLOGRAPHIC REFEREE.

No syntax errors found.      CIF dictionary      Interpreting this report

### Datablock: TPP\_Al\_phsalMe2

---

Bond precision:    C-C = 0.0053 Å                      Wavelength=0.71073

Cell:                a=13.324(13)                b=13.763(13)                c=14.190(14)  
                      alpha=91.243(14)        beta=104.039(13)        gamma=101.050(12)  
Temperature:        273 K

|                        | Calculated                                 | Reported           |
|------------------------|--------------------------------------------|--------------------|
| Volume                 | 2471(4)                                    | 2471(4)            |
| Space group            | P -1                                       | P -1               |
| Hall group             | -P 1                                       | -P 1               |
| Moiety formula         | C30 H26 Al N2 O4, C24 H20<br>P, 2(C2 H3 N) | ?                  |
| Sum formula            | C58 H52 Al N4 O4 P                         | C58 H52 Al N4 O4 P |
| Mr                     | 926.99                                     | 926.98             |
| Dx, g cm <sup>-3</sup> | 1.246                                      | 1.246              |
| Z                      | 2                                          | 2                  |
| Mu (mm <sup>-1</sup> ) | 0.125                                      | 0.125              |
| F000                   | 976.0                                      | 976.0              |
| F000'                  | 976.69                                     |                    |
| h, k, lmax             | 15, 16, 16                                 | 15, 16, 16         |
| Nref                   | 8725                                       | 8574               |
| Tmin, Tmax             | 0.990, 0.991                               | 0.890, 0.990       |
| Tmin'                  | 0.963                                      |                    |

Correction method= # Reported T Limits: Tmin=0.890 Tmax=0.990  
AbsCorr = MULTI-SCAN

Data completeness= 0.983                      Theta(max)= 25.030

|                               |                                    |
|-------------------------------|------------------------------------|
| R(reflections)= 0.0581( 5628) | wR2(reflections)=<br>0.1771( 8574) |
| S = 1.017                     | Npar= 947                          |

---

The following ALERTS were generated. Each ALERT has the format

**test-name\_ALERT\_alert-type\_alert-level.**

Click on the hyperlinks for more details of the test.

---

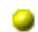

#### Alert level C

|                   |                                                 |         |        |
|-------------------|-------------------------------------------------|---------|--------|
| PLAT088_ALERT_3_C | Poor Data / Parameter Ratio .....               | 9.05    | Note   |
| PLAT244_ALERT_4_C | Low 'Solvent' Ueq as Compared to Neighbors of   | C56     | Check  |
| PLAT244_ALERT_4_C | Low 'Solvent' Ueq as Compared to Neighbors of   | C58     | Check  |
| PLAT260_ALERT_2_C | Large Average Ueq of Residue Including N3       | 0.132   | Check  |
| PLAT340_ALERT_3_C | Low Bond Precision on C-C Bonds .....           | 0.00527 | Ang.   |
| PLAT906_ALERT_3_C | Large K Value in the Analysis of Variance ..... | 4.604   | Check  |
| PLAT911_ALERT_3_C | Missing FCF Refl Between Thmin & STh/L= 0.595   | 146     | Report |
| PLAT977_ALERT_2_C | Check Negative Difference Density on H5'A .     | -0.31   | eA-3   |

---

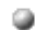

#### Alert level G

|                   |                                                  |             |        |
|-------------------|--------------------------------------------------|-------------|--------|
| PLAT002_ALERT_2_G | Number of Distance or Angle Restraints on AtSite | 72          | Note   |
| PLAT003_ALERT_2_G | Number of Uiso or Uij Restrained non-H Atoms ... | 104         | Report |
| PLAT175_ALERT_4_G | The CIF-Embedded .res File Contains SAME Records | 2           | Report |
| PLAT176_ALERT_4_G | The CIF-Embedded .res File Contains SADI Records | 36          | Report |
| PLAT178_ALERT_4_G | The CIF-Embedded .res File Contains SIMU Records | 1           | Report |
| PLAT199_ALERT_1_G | Reported _cell_measurement_temperature ..... (K) | 273         | Check  |
| PLAT200_ALERT_1_G | Reported _diffrn_ambient_temperature ..... (K)   | 273         | Check  |
| PLAT232_ALERT_2_G | Hirshfeld Test Diff (M-X) All --O4' .            | 6.5         | s.u.   |
| PLAT232_ALERT_2_G | Hirshfeld Test Diff (M-X) All --N1' .            | 6.0         | s.u.   |
| PLAT301_ALERT_3_G | Main Residue Disorder .....(Resd 1 )             | 97%         | Note   |
| PLAT333_ALERT_2_G | Large Aver C6-Ring C-C Dist C16' -C21' .         | 1.42        | Ang.   |
| PLAT335_ALERT_2_G | Check Large C6 Ring C-C Range C7 -C12            | 0.48        | Ang.   |
| PLAT335_ALERT_2_G | Check Large C6 Ring C-C Range C16 -C21           | 0.54        | Ang.   |
| PLAT335_ALERT_2_G | Check Large C6 Ring C-C Range C22 -C27           | 0.56        | Ang.   |
| PLAT335_ALERT_2_G | Check Large C6 Ring C-C Range C7' -C12'          | 0.49        | Ang.   |
| PLAT335_ALERT_2_G | Check Large C6 Ring C-C Range C16' -C21'         | 0.54        | Ang.   |
| PLAT335_ALERT_2_G | Check Large C6 Ring C-C Range C22' -C27'         | 0.57        | Ang.   |
| PLAT380_ALERT_4_G | Incorrectly? Oriented X(sp2)-Methyl Moiety ..... | C15         | Check  |
| PLAT720_ALERT_4_G | Number of Unusual/Non-Standard Labels .....      | 3           | Note   |
| PLAT773_ALERT_2_G | Check long C-C Bond in CIF: C5' --C6'            | 1.70        | Ang.   |
| PLAT802_ALERT_4_G | CIF Input Record(s) with more than 80 Characters | 1           | Info   |
| PLAT811_ALERT_5_G | No ADDSYM Analysis: Too Many Excluded Atoms .... | !           | Info   |
| PLAT860_ALERT_3_G | Number of Least-Squares Restraints .....         | 1458        | Note   |
| PLAT883_ALERT_1_G | No Info/Value for _atom_sites_solution_primary . | Please Do ! |        |
| PLAT909_ALERT_3_G | Percentage of I>2sig(I) Data at Theta(Max) Still | 36%         | Note   |
| PLAT941_ALERT_3_G | Average HKL Measurement Multiplicity .....       | 1.4         | Low    |
| PLAT978_ALERT_2_G | Number C-C Bonds with Positive Residual Density. | 5           | Info   |
| PLAT992_ALERT_5_G | Repd & Actual _reflns_number_gt Values Differ by | 5           | Check  |

---

0 **ALERT level A** = Most likely a serious problem - resolve or explain

0 **ALERT level B** = A potentially serious problem, consider carefully

8 **ALERT level C** = Check. Ensure it is not caused by an omission or oversight

28 **ALERT level G** = General information/check it is not something unexpected

3 ALERT type 1 CIF construction/syntax error, inconsistent or missing data

15 ALERT type 2 Indicator that the structure model may be wrong or deficient  
8 ALERT type 3 Indicator that the structure quality may be low  
8 ALERT type 4 Improvement, methodology, query or suggestion  
2 ALERT type 5 Informative message, check

---

---

It is advisable to attempt to resolve as many as possible of the alerts in all categories. Often the minor alerts point to easily fixed oversights, errors and omissions in your CIF or refinement strategy, so attention to these fine details can be worthwhile. In order to resolve some of the more serious problems it may be necessary to carry out additional measurements or structure refinements. However, the purpose of your study may justify the reported deviations and the more serious of these should normally be commented upon in the discussion or experimental section of a paper or in the "special\_details" fields of the CIF. checkCIF was carefully designed to identify outliers and unusual parameters, but every test has its limitations and alerts that are not important in a particular case may appear. Conversely, the absence of alerts does not guarantee there are no aspects of the results needing attention. It is up to the individual to critically assess their own results and, if necessary, seek expert advice.

### **Publication of your CIF in IUCr journals**

A basic structural check has been run on your CIF. These basic checks will be run on all CIFs submitted for publication in IUCr journals (*Acta Crystallographica*, *Journal of Applied Crystallography*, *Journal of Synchrotron Radiation*); however, if you intend to submit to *Acta Crystallographica Section C* or *E* or *IUCrData*, you should make sure that full publication checks are run on the final version of your CIF prior to submission.

### **Publication of your CIF in other journals**

Please refer to the *Notes for Authors* of the relevant journal for any special instructions relating to CIF submission.

---

**PLATON version of 20/01/2022; check.def file version of 19/01/2022**

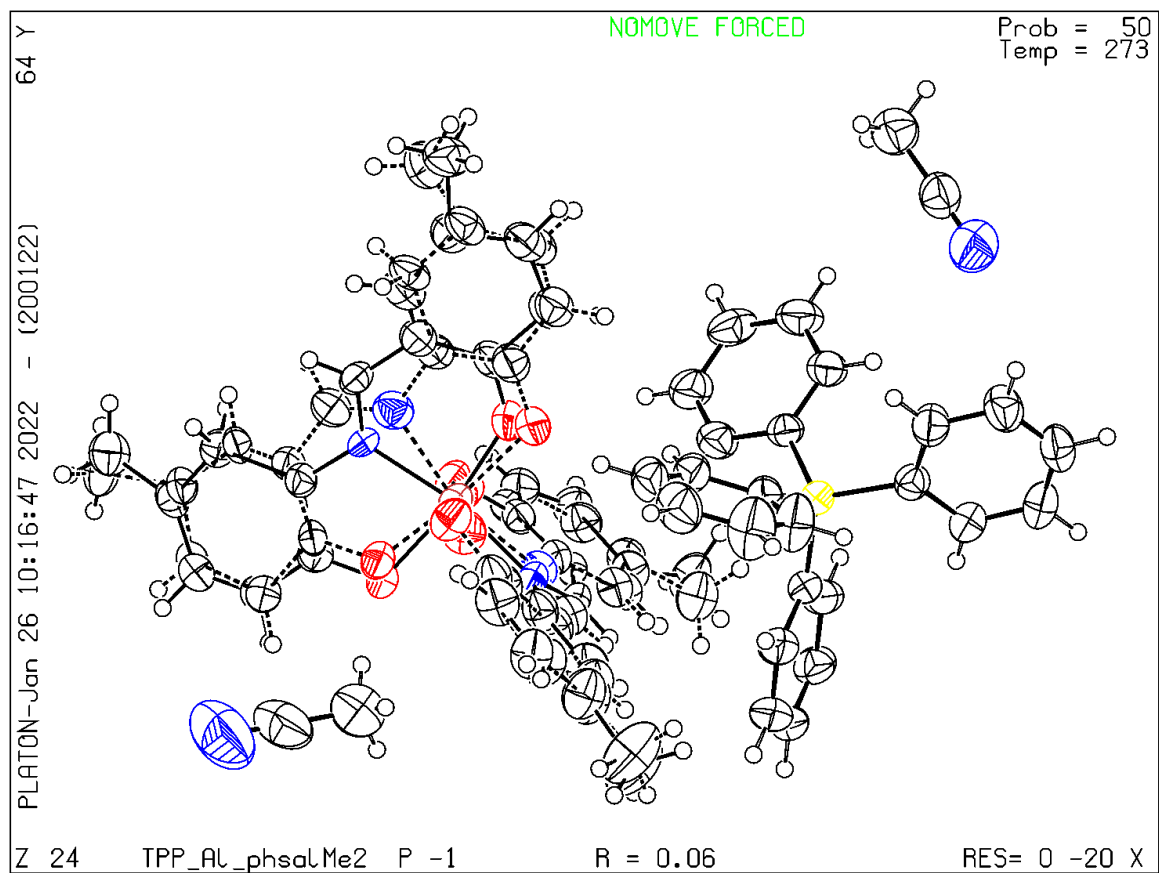

Supplement: s1 [file s1]
