# Supplementary material for: Molecular Structures and Redox Properties of Homoleptic Aluminum(III) Complexes with Azobisphenolate (azp) Ligands
Source: MDPI journal article supplement (doi:10.3390/inorganics10060084), 2022-06-16

## checkCIF/PLATON report

Structure factors have been supplied for datablock(s) TPP\_Al\_Me4azp2\_01

THIS REPORT IS FOR GUIDANCE ONLY. IF USED AS PART OF A REVIEW PROCEDURE FOR PUBLICATION, IT SHOULD NOT REPLACE THE EXPERTISE OF AN EXPERIENCED CRYSTALLOGRAPHIC REFEREE.

No syntax errors found.      CIF dictionary      Interpreting this report

### Datablock: TPP\_Al\_Me4azp2\_01

---

|                 |                                          |                       |             |
|-----------------|------------------------------------------|-----------------------|-------------|
| Bond precision: | C-C = 0.0060 A                           | Wavelength=0.71073    |             |
| Cell:           | a=21.806(4)                              | b=21.822(4)           | c=20.800(4) |
|                 | alpha=90                                 | beta=101.314(3)       | gamma=90    |
| Temperature:    | 90 K                                     |                       |             |
|                 | Calculated                               | Reported              |             |
| Volume          | 9705(3)                                  | 9705(3)               |             |
| Space group     | C 2/c                                    | C 1 2/c 1             |             |
| Hall group      | -C 2yc                                   | -C 2yc                |             |
|                 | C32 H32 Al N4 O4, C30 H26                |                       |             |
| Moiety formula  | Al N4 O4, 2(C24 H20 P),<br>3(O), 2(C H3) | ?                     |             |
| Sum formula     | C112 H104 Al2 N8 O11 P2                  | C56 H55 Al N4 O5.50 P |             |
| Mr              | 1853.93                                  | 929.99                |             |
| Dx, g cm-3      | 1.269                                    | 1.273                 |             |
| Z               | 4                                        | 8                     |             |
| Mu (mm-1)       | 0.130                                    | 0.130                 |             |
| F000            | 3904.0                                   | 3928.0                |             |
| F000'           | 3906.84                                  |                       |             |
| h, k, lmax      | 25, 25, 24                               | 25, 25, 24            |             |
| Nref            | 8570                                     | 8549                  |             |
| Tmin, Tmax      | 0.985, 0.994                             | 0.910, 0.990          |             |
| Tmin'           | 0.981                                    |                       |             |

Correction method= # Reported T Limits: Tmin=0.910 Tmax=0.990

AbsCorr = MULTI-SCAN

Data completeness= 0.998

Theta(max)= 25.030

R(reflections)= 0.0698( 5440)

wR2(reflections)=  
0.2098( 8549)

S = 1.062

Npar= 987

---

The following ALERTS were generated. Each ALERT has the format

**test-name\_ALERT\_alert-type\_alert-level.**

Click on the hyperlinks for more details of the test.

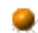

### Alert level B

PLAT306\_ALERT\_2\_B Isolated Oxygen Atom (H-atoms Missing ?) ..... 05 Check

**Author Response: The oxygen atom is a water molecule.**

PLAT306\_ALERT\_2\_B Isolated Oxygen Atom (H-atoms Missing ?) ..... 06 Check

**Author Response: The oxygen atom is a water molecule.**

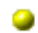

### Alert level C

|                   |                                                  |                 |              |
|-------------------|--------------------------------------------------|-----------------|--------------|
| PLAT041_ALERT_1_C | Calc. and Reported SumFormula                    | Strings Differ  | Please Check |
| PLAT043_ALERT_1_C | Calculated and Reported Mol. Weight Differ by .. | 6.05            | Check        |
| PLAT068_ALERT_1_C | Reported F000 Differs from Calcd (or Missing)... |                 | Please Check |
| PLAT088_ALERT_3_C | Poor Data / Parameter Ratio .....                | 8.66            | Note         |
| PLAT094_ALERT_2_C | Ratio of Maximum / Minimum Residual Density .... | 2.01            | Report       |
| PLAT234_ALERT_4_C | Large Hirshfeld Difference C2 --C7               | 0.17            | Ang.         |
| PLAT260_ALERT_2_C | Large Average Ueq of Residue Including           | 05              | 0.153 Check  |
| PLAT260_ALERT_2_C | Large Average Ueq of Residue Including           | 06              | 0.174 Check  |
| PLAT340_ALERT_3_C | Low Bond Precision on C-C Bonds .....            | 0.006           | Ang.         |
| PLAT906_ALERT_3_C | Large K Value in the Analysis of Variance .....  | 9.129           | Check        |
| PLAT911_ALERT_3_C | Missing FCF Refl Between Thmin & STh/L=          | 0.595           | 21 Report    |
| PLAT976_ALERT_2_C | Check Calcd Resid. Dens.                         | 0.85Ang From O6 | -0.50 eA-3   |
| PLAT976_ALERT_2_C | Check Calcd Resid. Dens.                         | 0.69Ang From O6 | -0.48 eA-3   |
| PLAT976_ALERT_2_C | Check Calcd Resid. Dens.                         | 0.66Ang From O6 | -0.47 eA-3   |
| PLAT976_ALERT_2_C | Check Calcd Resid. Dens.                         | 0.73Ang From O6 | -0.42 eA-3   |
| PLAT976_ALERT_2_C | Check Calcd Resid. Dens.                         | 0.82Ang From O6 | -0.41 eA-3   |

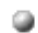

### Alert level G

FORMU01\_ALERT\_2\_G There is a discrepancy between the atom counts in the  
\_chemical\_formula\_sum and the formula from the \_atom\_site\* data.  
Atom count from \_chemical\_formula\_sum: C56 H55 Al1 N4 O5.5 P1  
Atom count from the \_atom\_site data: C56 H52 Al1 N4 O5.5 P1

CELLZ01\_ALERT\_1\_G Difference between formula and atom\_site contents detected.

CELLZ01\_ALERT\_1\_G WARNING: H atoms missing from atom site list. Is this intentional?

From the CIF: \_cell\_formula\_units\_Z 8  
From the CIF: \_chemical\_formula\_sum C56 H55 Al1 N4 O5.50 P  
TEST: Compare cell contents of formula and atom\_site data

| atom | Z*formula | cif sites | diff |
|------|-----------|-----------|------|
| C    | 448.00    | 448.00    | 0.00 |

|    |        |        |       |
|----|--------|--------|-------|
| H  | 440.00 | 416.00 | 24.00 |
| Al | 8.00   | 8.00   | 0.00  |
| N  | 32.00  | 32.00  | 0.00  |
| O  | 44.00  | 44.00  | 0.00  |
| P  | 8.00   | 8.00   | 0.00  |

|                   |                                                  |       |        |
|-------------------|--------------------------------------------------|-------|--------|
| PLAT002_ALERT_2_G | Number of Distance or Angle Restraints on AtSite | 81    | Note   |
| PLAT003_ALERT_2_G | Number of Uiso or Uij Restrained non-H Atoms ... | 107   | Report |
| PLAT045_ALERT_1_G | Calculated and Reported Z Differ by a Factor ... | 0.500 | Check  |
| PLAT083_ALERT_2_G | SHELXL Second Parameter in WGHT Unusually Large  | 25.49 | Why ?  |
| PLAT175_ALERT_4_G | The CIF-Embedded .res File Contains SAME Records | 3     | Report |
| PLAT176_ALERT_4_G | The CIF-Embedded .res File Contains SADI Records | 28    | Report |
| PLAT178_ALERT_4_G | The CIF-Embedded .res File Contains SIMU Records | 1     | Report |
| PLAT186_ALERT_4_G | The CIF-Embedded .res File Contains ISOR Records | 1     | Report |
| PLAT300_ALERT_4_G | Atom Site Occupancy of O3 Constrained at         | 0.5   | Check  |
| PLAT300_ALERT_4_G | Atom Site Occupancy of O3' Constrained at        | 0.5   | Check  |
| PLAT300_ALERT_4_G | Atom Site Occupancy of O4 Constrained at         | 0.5   | Check  |
| PLAT300_ALERT_4_G | Atom Site Occupancy of O4' Constrained at        | 0.5   | Check  |
| PLAT300_ALERT_4_G | Atom Site Occupancy of N3 Constrained at         | 0.5   | Check  |
| PLAT300_ALERT_4_G | Atom Site Occupancy of N3' Constrained at        | 0.5   | Check  |
| PLAT300_ALERT_4_G | Atom Site Occupancy of N4 Constrained at         | 0.5   | Check  |
| PLAT300_ALERT_4_G | Atom Site Occupancy of N4' Constrained at        | 0.5   | Check  |
| PLAT300_ALERT_4_G | Atom Site Occupancy of C17 Constrained at        | 0.5   | Check  |
| PLAT300_ALERT_4_G | Atom Site Occupancy of C17' Constrained at       | 0.5   | Check  |
| PLAT300_ALERT_4_G | Atom Site Occupancy of C18 Constrained at        | 0.5   | Check  |
| PLAT300_ALERT_4_G | Atom Site Occupancy of C18' Constrained at       | 0.5   | Check  |
| PLAT300_ALERT_4_G | Atom Site Occupancy of C19 Constrained at        | 0.5   | Check  |
| PLAT300_ALERT_4_G | Atom Site Occupancy of C19' Constrained at       | 0.5   | Check  |
| PLAT300_ALERT_4_G | Atom Site Occupancy of C20 Constrained at        | 0.5   | Check  |
| PLAT300_ALERT_4_G | Atom Site Occupancy of C20' Constrained at       | 0.5   | Check  |
| PLAT300_ALERT_4_G | Atom Site Occupancy of C21 Constrained at        | 0.5   | Check  |
| PLAT300_ALERT_4_G | Atom Site Occupancy of C21' Constrained at       | 0.5   | Check  |
| PLAT300_ALERT_4_G | Atom Site Occupancy of C22 Constrained at        | 0.5   | Check  |
| PLAT300_ALERT_4_G | Atom Site Occupancy of C22' Constrained at       | 0.5   | Check  |
| PLAT300_ALERT_4_G | Atom Site Occupancy of C23 Constrained at        | 0.5   | Check  |
| PLAT300_ALERT_4_G | Atom Site Occupancy of C23' Constrained at       | 0.5   | Check  |
| PLAT300_ALERT_4_G | Atom Site Occupancy of C24 Constrained at        | 0.5   | Check  |
| PLAT300_ALERT_4_G | Atom Site Occupancy of C24' Constrained at       | 0.5   | Check  |
| PLAT300_ALERT_4_G | Atom Site Occupancy of C25 Constrained at        | 0.5   | Check  |
| PLAT300_ALERT_4_G | Atom Site Occupancy of C25' Constrained at       | 0.5   | Check  |
| PLAT300_ALERT_4_G | Atom Site Occupancy of C26 Constrained at        | 0.5   | Check  |
| PLAT300_ALERT_4_G | Atom Site Occupancy of C26' Constrained at       | 0.5   | Check  |
| PLAT300_ALERT_4_G | Atom Site Occupancy of C27 Constrained at        | 0.5   | Check  |
| PLAT300_ALERT_4_G | Atom Site Occupancy of C27' Constrained at       | 0.5   | Check  |
| PLAT300_ALERT_4_G | Atom Site Occupancy of C28 Constrained at        | 0.5   | Check  |
| PLAT300_ALERT_4_G | Atom Site Occupancy of C28' Constrained at       | 0.5   | Check  |
| PLAT300_ALERT_4_G | Atom Site Occupancy of C29 Constrained at        | 0.5   | Check  |
| PLAT300_ALERT_4_G | Atom Site Occupancy of C29' Constrained at       | 0.5   | Check  |
| PLAT300_ALERT_4_G | Atom Site Occupancy of C30 Constrained at        | 0.5   | Check  |
| PLAT300_ALERT_4_G | Atom Site Occupancy of C30' Constrained at       | 0.5   | Check  |
| PLAT300_ALERT_4_G | Atom Site Occupancy of C31 Constrained at        | 0.5   | Check  |
| PLAT300_ALERT_4_G | Atom Site Occupancy of C31' Constrained at       | 0.5   | Check  |
| PLAT300_ALERT_4_G | Atom Site Occupancy of C32 Constrained at        | 0.5   | Check  |
| PLAT300_ALERT_4_G | Atom Site Occupancy of C32' Constrained at       | 0.5   | Check  |
| PLAT300_ALERT_4_G | Atom Site Occupancy of H19 Constrained at        | 0.5   | Check  |
| PLAT300_ALERT_4_G | Atom Site Occupancy of H19' Constrained at       | 0.5   | Check  |
| PLAT300_ALERT_4_G | Atom Site Occupancy of H21 Constrained at        | 0.5   | Check  |
| PLAT300_ALERT_4_G | Atom Site Occupancy of H21' Constrained at       | 0.5   | Check  |

|                   |                                                  |                |      |              |
|-------------------|--------------------------------------------------|----------------|------|--------------|
| PLAT300_ALERT_4_G | Atom Site Occupancy of H23A                      | Constrained at | 0.5  | Check        |
| PLAT300_ALERT_4_G | Atom Site Occupancy of H23B                      | Constrained at | 0.5  | Check        |
| PLAT300_ALERT_4_G | Atom Site Occupancy of H23C                      | Constrained at | 0.5  | Check        |
| PLAT300_ALERT_4_G | Atom Site Occupancy of H23D                      | Constrained at | 0.5  | Check        |
| PLAT300_ALERT_4_G | Atom Site Occupancy of H23E                      | Constrained at | 0.5  | Check        |
| PLAT300_ALERT_4_G | Atom Site Occupancy of H23F                      | Constrained at | 0.5  | Check        |
| PLAT300_ALERT_4_G | Atom Site Occupancy of H24A                      | Constrained at | 0.5  | Check        |
| PLAT300_ALERT_4_G | Atom Site Occupancy of H24B                      | Constrained at | 0.5  | Check        |
| PLAT300_ALERT_4_G | Atom Site Occupancy of H24C                      | Constrained at | 0.5  | Check        |
| PLAT300_ALERT_4_G | Atom Site Occupancy of H24D                      | Constrained at | 0.5  | Check        |
| PLAT300_ALERT_4_G | Atom Site Occupancy of H24E                      | Constrained at | 0.5  | Check        |
| PLAT300_ALERT_4_G | Atom Site Occupancy of H24F                      | Constrained at | 0.5  | Check        |
| PLAT300_ALERT_4_G | Atom Site Occupancy of H27                       | Constrained at | 0.5  | Check        |
| PLAT300_ALERT_4_G | Atom Site Occupancy of H27'                      | Constrained at | 0.5  | Check        |
| PLAT300_ALERT_4_G | Atom Site Occupancy of H29                       | Constrained at | 0.5  | Check        |
| PLAT300_ALERT_4_G | Atom Site Occupancy of H29'                      | Constrained at | 0.5  | Check        |
| PLAT300_ALERT_4_G | Atom Site Occupancy of H31A                      | Constrained at | 0.5  | Check        |
| PLAT300_ALERT_4_G | Atom Site Occupancy of H31B                      | Constrained at | 0.5  | Check        |
| PLAT300_ALERT_4_G | Atom Site Occupancy of H31C                      | Constrained at | 0.5  | Check        |
| PLAT300_ALERT_4_G | Atom Site Occupancy of H31D                      | Constrained at | 0.5  | Check        |
| PLAT300_ALERT_4_G | Atom Site Occupancy of H31E                      | Constrained at | 0.5  | Check        |
| PLAT300_ALERT_4_G | Atom Site Occupancy of H31F                      | Constrained at | 0.5  | Check        |
| PLAT300_ALERT_4_G | Atom Site Occupancy of H32A                      | Constrained at | 0.5  | Check        |
| PLAT300_ALERT_4_G | Atom Site Occupancy of H32B                      | Constrained at | 0.5  | Check        |
| PLAT300_ALERT_4_G | Atom Site Occupancy of H32C                      | Constrained at | 0.5  | Check        |
| PLAT300_ALERT_4_G | Atom Site Occupancy of H32D                      | Constrained at | 0.5  | Check        |
| PLAT300_ALERT_4_G | Atom Site Occupancy of H32E                      | Constrained at | 0.5  | Check        |
| PLAT300_ALERT_4_G | Atom Site Occupancy of H32F                      | Constrained at | 0.5  | Check        |
| PLAT301_ALERT_3_G | Main Residue Disorder .....(Resd 1 )             |                | 98%  | Note         |
| PLAT302_ALERT_4_G | Anion/Solvent/Minor-Residue Disorder (Resd 2 )   |                | 97%  | Note         |
| PLAT302_ALERT_4_G | Anion/Solvent/Minor-Residue Disorder (Resd 6 )   |                | 100% | Note         |
| PLAT302_ALERT_4_G | Anion/Solvent/Minor-Residue Disorder (Resd 7 )   |                | 100% | Note         |
| PLAT304_ALERT_4_G | Non-Integer Number of Atoms in ..... (Resd 4 )   |                | 0.50 | Check        |
| PLAT304_ALERT_4_G | Non-Integer Number of Atoms in ..... (Resd 6 )   |                | 2.06 | Check        |
| PLAT304_ALERT_4_G | Non-Integer Number of Atoms in ..... (Resd 7 )   |                | 1.94 | Check        |
| PLAT720_ALERT_4_G | Number of Unusual/Non-Standard Labels .....      |                | 6    | Note         |
| PLAT767_ALERT_4_G | INS Embedded LIST 6 Instruction Should be LIST 4 |                |      | Please Check |
| PLAT773_ALERT_2_G | Check long C-C Bond in CIF: C4 --C8              |                | 1.76 | Ang.         |
| PLAT773_ALERT_2_G | Check long C-C Bond in CIF: C5 --C6              |                | 1.82 | Ang.         |
| PLAT773_ALERT_2_G | Check long C-C Bond in CIF: C9 --C14             |                | 1.80 | Ang.         |
| PLAT773_ALERT_2_G | Check long C-C Bond in CIF: C4' --C8'            |                | 1.77 | Ang.         |
| PLAT773_ALERT_2_G | Check long C-C Bond in CIF: C5' --C6'            |                | 1.82 | Ang.         |
| PLAT773_ALERT_2_G | Check long C-C Bond in CIF: C9' --C14'           |                | 1.79 | Ang.         |
| PLAT790_ALERT_4_G | Centre of Gravity not Within Unit Cell: Resd. #  |                | 4    | Note         |
|                   | 0                                                |                |      |              |
| PLAT802_ALERT_4_G | CIF Input Record(s) with more than 80 Characters |                | 1    | Info         |
| PLAT811_ALERT_5_G | No ADDSYM Analysis: Too Many Excluded Atoms .... |                | !    | Info         |
| PLAT860_ALERT_3_G | Number of Least-Squares Restraints .....         |                | 1606 | Note         |
| PLAT883_ALERT_1_G | No Info/Value for _atom_sites_solution_primary . |                |      | Please Do !  |
| PLAT909_ALERT_3_G | Percentage of I>2sig(I) Data at Theta(Max) Still |                | 33%  | Note         |
| PLAT933_ALERT_2_G | Number of HKL-OMIT Records in Embedded .res File |                | 2    | Note         |
| PLAT941_ALERT_3_G | Average HKL Measurement Multiplicity .....       |                | 2.7  | Low          |
| PLAT978_ALERT_2_G | Number C-C Bonds with Positive Residual Density. |                | 0    | Info         |

---

0 **ALERT level A** = Most likely a serious problem - resolve or explain

2 **ALERT level B** = A potentially serious problem, consider carefully

16 **ALERT level C** = Check. Ensure it is not caused by an omission or oversight  
107 **ALERT level G** = General information/check it is not something unexpected

7 ALERT type 1 CIF construction/syntax error, inconsistent or missing data  
22 ALERT type 2 Indicator that the structure model may be wrong or deficient  
8 ALERT type 3 Indicator that the structure quality may be low  
87 ALERT type 4 Improvement, methodology, query or suggestion  
1 ALERT type 5 Informative message, check

---

It is advisable to attempt to resolve as many as possible of the alerts in all categories. Often the minor alerts point to easily fixed oversights, errors and omissions in your CIF or refinement strategy, so attention to these fine details can be worthwhile. In order to resolve some of the more serious problems it may be necessary to carry out additional measurements or structure refinements. However, the purpose of your study may justify the reported deviations and the more serious of these should normally be commented upon in the discussion or experimental section of a paper or in the "special\_details" fields of the CIF. checkCIF was carefully designed to identify outliers and unusual parameters, but every test has its limitations and alerts that are not important in a particular case may appear. Conversely, the absence of alerts does not guarantee there are no aspects of the results needing attention. It is up to the individual to critically assess their own results and, if necessary, seek expert advice.

### **Publication of your CIF in IUCr journals**

A basic structural check has been run on your CIF. These basic checks will be run on all CIFs submitted for publication in IUCr journals (*Acta Crystallographica*, *Journal of Applied Crystallography*, *Journal of Synchrotron Radiation*); however, if you intend to submit to *Acta Crystallographica Section C* or *E* or *IUCrData*, you should make sure that full publication checks are run on the final version of your CIF prior to submission.

### **Publication of your CIF in other journals**

Please refer to the *Notes for Authors* of the relevant journal for any special instructions relating to CIF submission.

---

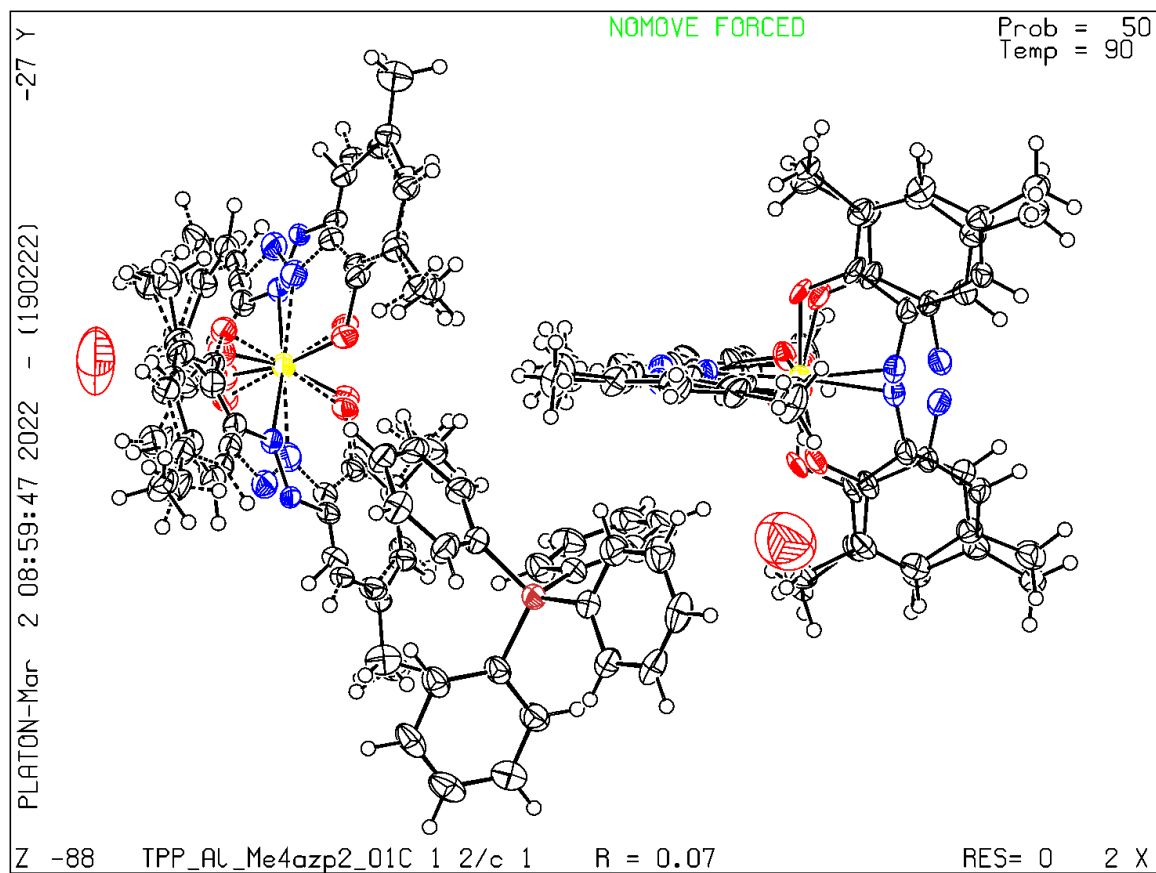

Supplement: s1 [file s1]
