# Supplementary material for: Molecular Structures and Redox Properties of Homoleptic Aluminum(III) Complexes with Azobisphenolate (azp) Ligands
Source: MDPI journal article supplement (doi:10.3390/inorganics10060084), 2022-06-16
Supplement: s1 [file s1]

## Supplementary Materials

### Contents

|                                                                                                                       |     |
|-----------------------------------------------------------------------------------------------------------------------|-----|
| <b>Figure S1.</b> Cyclic voltammograms in the full potential range of the cathodic and anodic scans.                  | S2  |
| <b>Figure S2.</b> Cyclic voltammograms in the presence of an equivalent mole of ferrocene.                            | S3  |
| <b>Figure S3.</b> Molecular orbital surfaces of the SOMOs for the neutral Al <sup>III</sup> complexes.                | S4  |
| <b>Table S1.</b> Crystallographic data for the Al <sup>III</sup> complexes <b>1</b> and <b>2</b> .                    | S5  |
| <b>Table S2.</b> Cartesian coordinates of the [Al <sup>III</sup> (L1 <sup>Cl2</sup> ) <sub>2</sub> ] anion.           | S6  |
| <b>Table S3.</b> Cartesian coordinates of the [Al <sup>III</sup> (L1 <sup>Me2</sup> ) <sub>2</sub> ] anion.           | S8  |
| <b>Table S4.</b> Cartesian coordinates of the [Al <sup>III</sup> (L1 <sup>Me4</sup> ) <sub>2</sub> ] anion.           | S10 |
| <b>Table S5.</b> Cartesian coordinates of the [Al <sup>III</sup> (L2 <sup>Me2</sup> ) <sub>2</sub> ] anion.           | S13 |
| <b>Table S6.</b> Cartesian coordinates of the neutral [Al <sup>III</sup> (L1 <sup>Me2</sup> ) <sub>2</sub> ] complex. | S15 |
| <b>Table S7.</b> Cartesian coordinates of the neutral [Al <sup>III</sup> (L2 <sup>Me2</sup> ) <sub>2</sub> ] complex. | S17 |

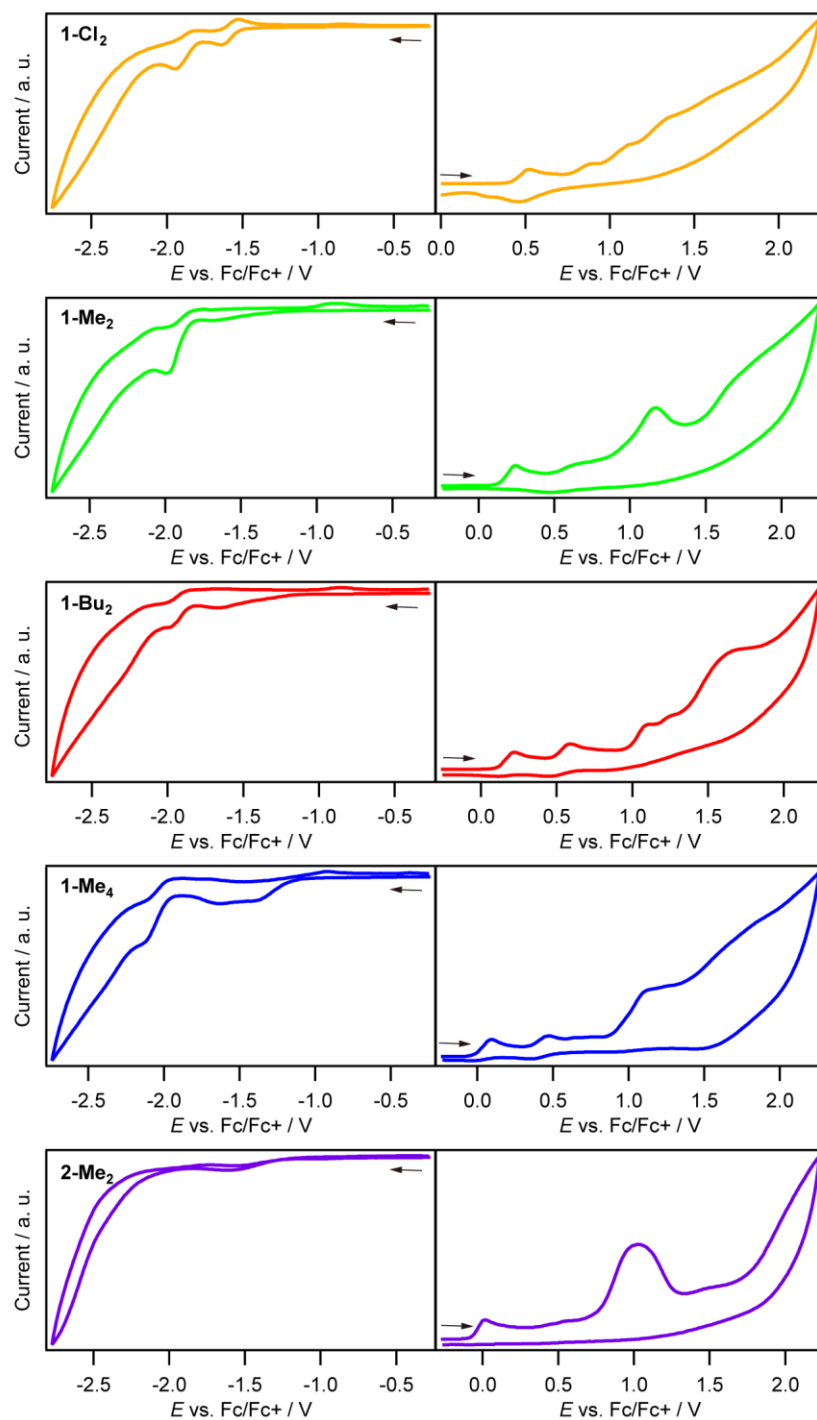

**Figure S1.** Cyclic voltammograms in the full potential range of the cathodic (left) and anodic (right) scans. Solvent: 0.1 M Bu<sub>4</sub>NPF<sub>6</sub> solution of dichloromethane, Scan speed: 100 mV s<sup>-1</sup>.

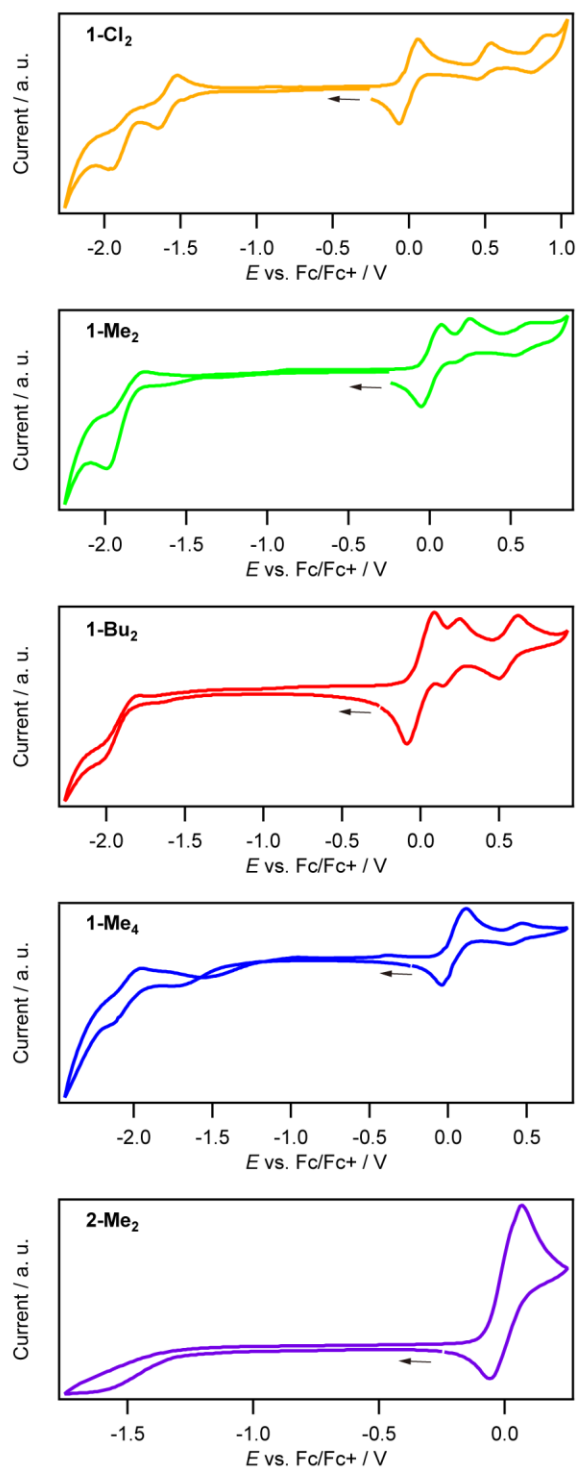

**Figure S2.** Cyclic voltammograms in the presence of an equivalent mole of ferrocene. For **1- $\text{Me}_4$**  and **2- $\text{Me}_2$** , the first oxidation waves of the  $\text{Al}^{\text{III}}$  complex anions overlapped with the oxidation wave of ferrocene.

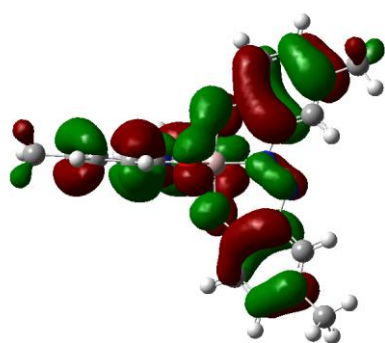

(a)

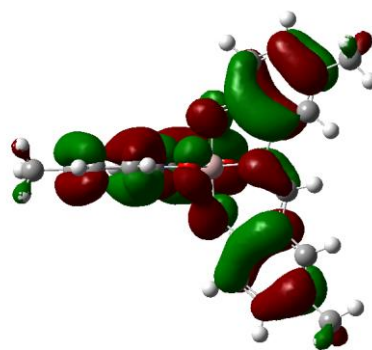

(b)

**Figure S2.** Molecular orbital surfaces of the SOMOs for the neutral  $\text{Al}^{\text{III}}$  complexes  $[\text{Al}^{\text{III}}(\text{L1}^{\text{Me2}})_2]$  (a) and  $[\text{Al}^{\text{III}}(\text{L2}^{\text{Me2}})_2]$  (b).

**Table S1.** Crystallographic data for the Al<sup>III</sup> complexes **1** and **2**.

|                                                           | <b>1-Cl<sub>2</sub>-solvent</b>                                                   | <b>1-Me<sub>2</sub>-CH<sub>3</sub>OH·H<sub>2</sub>O</b>           | <b>1-Bu<sub>2</sub></b>                                           | <b>1-Me<sub>4</sub>·1.5H<sub>2</sub>O</b>                           | <b>2-Me<sub>2</sub>-2CH<sub>3</sub>CN</b>                         |
|-----------------------------------------------------------|-----------------------------------------------------------------------------------|-------------------------------------------------------------------|-------------------------------------------------------------------|---------------------------------------------------------------------|-------------------------------------------------------------------|
| Formula                                                   | C <sub>48</sub> H <sub>32</sub> AlCl <sub>4</sub> N <sub>4</sub> O <sub>4</sub> P | C <sub>53</sub> H <sub>48</sub> AlN <sub>4</sub> O <sub>6</sub> P | C <sub>64</sub> H <sub>68</sub> AlN <sub>4</sub> O <sub>4</sub> P | C <sub>56</sub> H <sub>55</sub> AlN <sub>4</sub> O <sub>5.5</sub> P | C <sub>58</sub> H <sub>52</sub> AlN <sub>4</sub> O <sub>4</sub> P |
| Formula Weight                                            | 928.52                                                                            | 894.90                                                            | 1015.17                                                           | 929.99                                                              | 926.98                                                            |
| Color                                                     | black needle                                                                      | red block                                                         | black platelet                                                    | black platelet                                                      | orange needle                                                     |
| Dimension / mm                                            | 0.40 × 0.05 × 0.01                                                                | 0.30 × 0.17 × 0.12                                                | 0.40 × 0.40 × 0.10                                                | 0.15 × 0.10 × 0.05                                                  | 0.30 × 0.07 × 0.07                                                |
| <i>T</i> / K                                              | 90                                                                                | 90                                                                | 293                                                               | 90                                                                  | 273                                                               |
| Crystal System                                            | orthorhombic                                                                      | triclinic                                                         | triclinic                                                         | monoclinic                                                          | triclinic                                                         |
| Space Group                                               | <i>Pna</i> 2 <sub>1</sub>                                                         | <i>P</i> -1                                                       | <i>P</i> -1                                                       | <i>C</i> 2/ <i>c</i>                                                | <i>P</i> -1                                                       |
| <i>a</i> / Å                                              | 13.424(2)                                                                         | 11.8738(19)                                                       | 13.374(7)                                                         | 21.806(4)                                                           | 13.324(13)                                                        |
| <i>b</i> / Å                                              | 16.380(3)                                                                         | 13.224(2)                                                         | 14.095(8)                                                         | 21.822(4)                                                           | 13.763(13)                                                        |
| <i>c</i> / Å                                              | 41.151(7)                                                                         | 16.406(3)                                                         | 16.593(9)                                                         | 20.800(4)                                                           | 14.190(14)                                                        |
| <i>α</i> / °                                              | 90                                                                                | 81.934(2)                                                         | 96.179(8)                                                         | 90                                                                  | 91.243(14)                                                        |
| <i>β</i> / °                                              | 90                                                                                | 81.586(2)                                                         | 106.731(7)                                                        | 101.314(3)                                                          | 104.039(13)                                                       |
| <i>γ</i> / °                                              | 90                                                                                | 64.230(2)                                                         | 103.041(7)                                                        | 90                                                                  | 101.050(12)                                                       |
| <i>V</i> / Å <sup>3</sup>                                 | 9048(3)                                                                           | 2286.5(6)                                                         | 2868(3)                                                           | 9705(3)                                                             | 2471(4)                                                           |
| <i>Z</i>                                                  | 8                                                                                 | 2                                                                 | 2                                                                 | 8                                                                   | 2                                                                 |
| $\rho_{\text{calcd}}$ / g cm <sup>-3</sup>                | 1.363                                                                             | 1.300                                                             | 1.176                                                             | 1.273                                                               | 1.246                                                             |
| $\mu$ (Mo-K $\alpha$ )                                    | 0.365                                                                             | 0.136                                                             | 0.113                                                             | 0.130                                                               | 0.125                                                             |
| $2\theta_{\text{max}}$ / °                                | 54.96                                                                             | 53.46                                                             | 50.06                                                             | 50.06                                                               | 50.06                                                             |
| No. Reflections ( <i>R</i> <sub>int</sub> )               | 51060 (0.0591)                                                                    | 12543 (0.0173)                                                    | 14118 (0.0167)                                                    | 23418 (0.0507)                                                      | 11791 (0.0228)                                                    |
| No. Observations ( <i>I</i> > 2.00 $\sigma$ ( <i>I</i> )) | 19535 (14707)                                                                     | 9378 (7563)                                                       | 10014 (7356)                                                      | 8549 (5440)                                                         | 8574 (5628)                                                       |
| No. Variables                                             | 1118                                                                              | 739                                                               | 1125                                                              | 987                                                                 | 947                                                               |
| <i>R</i> 1 ( <i>I</i> > 2.00 $\sigma$ ( <i>I</i> ))       | 0.0460                                                                            | 0.0703                                                            | 0.0562                                                            | 0.0698                                                              | 0.0581                                                            |
| <i>R</i> (all data)                                       | 0.0746                                                                            | 0.0843                                                            | 0.0773                                                            | 0.1110                                                              | 0.0948                                                            |
| <i>wR</i> 2 (all data)                                    | 0.0961                                                                            | 0.2036                                                            | 0.1648                                                            | 0.2098                                                              | 0.1771                                                            |
| Residual Electron Density / e Å <sup>-3</sup>             | 0.326<br>-0.318                                                                   | 1.873<br>-0.820                                                   | 0.499<br>-0.412                                                   | 0.998<br>-0.497                                                     | 0.420<br>-0.282                                                   |
| Goodness of Fit                                           | 1.008                                                                             | 1.039                                                             | 1.044                                                             | 1.062                                                               | 1.017                                                             |
| CCDC deposit. No.                                         | 2156173                                                                           | 2156174                                                           | 2156175                                                           | 2156176                                                             | 2156177                                                           |

**Table S2.** Cartesian coordinates of the  $[\text{Al}(\text{L1}^{\text{Cl}_2})_2]$  anion.

|    |          |          |          |
|----|----------|----------|----------|
| Al | -0.00002 | -0.00003 | -0.23692 |
| O  | 0.01343  | 1.35481  | -1.57199 |
| O  | -0.33376 | -1.28134 | 1.09085  |
| N  | -2.02071 | 0.32344  | -0.31571 |
| N  | -2.98952 | -0.21736 | 0.31022  |
| C  | -1.15993 | 1.82663  | -1.90149 |
| C  | -1.34413 | 2.83438  | -2.87509 |
| H  | -0.47378 | 3.23844  | -3.37847 |
| C  | -2.61259 | 3.29864  | -3.18111 |
| H  | -2.74393 | 4.07138  | -3.92857 |
| C  | -3.73289 | 2.76893  | -2.52281 |
| C  | -3.60769 | 1.78323  | -1.56455 |
| H  | -4.46808 | 1.37235  | -1.05419 |
| C  | -2.32382 | 1.31441  | -1.25638 |
| C  | -1.44227 | -1.71087 | 1.60743  |
| C  | -1.40719 | -2.73237 | 2.59284  |
| H  | -0.43558 | -3.12125 | 2.87392  |
| C  | -2.55409 | -3.22356 | 3.18147  |
| H  | -2.49229 | -4.00364 | 3.93041  |
| C  | -3.80630 | -2.70849 | 2.80591  |
| C  | -3.90185 | -1.72029 | 1.85782  |
| H  | -4.85872 | -1.31326 | 1.55689  |
| C  | -2.73675 | -1.20214 | 1.24055  |
| O  | -0.01357 | -1.35506 | -1.57178 |
| O  | 0.33384  | 1.28148  | 1.09063  |
| N  | 2.02067  | -0.32352 | -0.31583 |
| N  | 2.98954  | 0.21734  | 0.30997  |
| C  | 1.15976  | -1.82692 | -1.90133 |
| C  | 1.34387  | -2.83479 | -2.87482 |
| H  | 0.47347  | -3.23892 | -3.37807 |
| C  | 2.61230  | -3.29909 | -3.18089 |

|    |          |          |          |
|----|----------|----------|----------|
| H  | 2.74358  | -4.07193 | -3.92826 |
| C  | 3.73266  | -2.76929 | -2.52277 |
| C  | 3.60755  | -1.78347 | -1.56462 |
| H  | 4.46798  | -1.37251 | -1.05439 |
| C  | 2.32370  | -1.31461 | -1.25639 |
| C  | 1.44239  | 1.71103  | 1.60710  |
| C  | 1.40740  | 2.73266  | 2.59239  |
| H  | 0.43581  | 3.12160  | 2.87348  |
| C  | 2.55434  | 3.22387  | 3.18091  |
| H  | 2.49260  | 4.00404  | 3.92976  |
| C  | 3.80652  | 2.70872  | 2.80534  |
| C  | 3.90199  | 1.72042  | 1.85735  |
| H  | 4.85884  | 1.31333  | 1.55642  |
| C  | 2.73684  | 1.20223  | 1.24021  |
| Cl | -5.34087 | 3.38587  | -2.93708 |
| Cl | 5.26768  | 3.34878  | 3.56885  |
| Cl | 5.34061  | -3.38627 | -2.93710 |
| Cl | -5.26741 | -3.34851 | 3.56956  |

**Table S3.** Cartesian coordinates of the [Al(L1<sup>Me2</sup>)<sub>2</sub>] anion.

|    |          |          |          |
|----|----------|----------|----------|
| Al | 4.96191  | 3.16829  | 12.21311 |
| O  | 3.66095  | 3.67899  | 10.91707 |
| O  | 6.31659  | 2.43539  | 13.28545 |
| N  | 5.47325  | 1.80937  | 10.77068 |
| N  | 6.39101  | 0.92411  | 10.73161 |
| C  | 3.68092  | 2.97932  | 9.80922  |
| C  | 2.78536  | 3.19682  | 8.73772  |
| H  | 2.04332  | 3.98172  | 8.83408  |
| C  | 2.85797  | 2.42069  | 7.59287  |
| H  | 2.15624  | 2.60965  | 6.78525  |
| C  | 3.81336  | 1.39007  | 7.43964  |
| C  | 4.69948  | 1.16460  | 8.48376  |
| H  | 5.44919  | 0.38520  | 8.41464  |
| C  | 4.64138  | 1.94023  | 9.65207  |
| C  | 3.85628  | 0.56782  | 6.17263  |
| H  | 4.04760  | 1.19373  | 5.29451  |
| H  | 2.90676  | 0.05107  | 5.99733  |
| H  | 4.64296  | -0.18813 | 6.21999  |
| C  | 7.18927  | 1.50400  | 13.03845 |
| C  | 8.16034  | 1.17165  | 14.01824 |
| H  | 8.13467  | 1.72520  | 14.95046 |
| C  | 9.10472  | 0.18787  | 13.80471 |
| H  | 9.82737  | -0.02599 | 14.58728 |
| C  | 9.15912  | -0.54811 | 12.59765 |
| C  | 8.22180  | -0.24216 | 11.63192 |
| H  | 8.21136  | -0.77183 | 10.68464 |
| C  | 7.23604  | 0.76293  | 11.80934 |
| C  | 10.20683 | -1.61602 | 12.39125 |
| H  | 10.09454 | -2.09489 | 11.41631 |
| H  | 10.14008 | -2.39605 | 13.15679 |
| H  | 11.21835 | -1.19967 | 12.44417 |



|   |          |          |          |
|---|----------|----------|----------|
| O | 6.16010  | 4.50945  | 11.58235 |
| O | 3.70014  | 2.06008  | 13.05264 |
| N | 4.44678  | 4.63541  | 13.54386 |
| N | 3.60657  | 4.64819  | 14.50382 |
| C | 6.08430  | 5.65755  | 12.21003 |
| C | 6.87162  | 6.78100  | 11.87096 |
| H | 7.57317  | 6.69292  | 11.04881 |
| C | 6.74393  | 7.96701  | 12.57486 |
| H | 7.36097  | 8.81497  | 12.29095 |
| C | 5.83656  | 8.11226  | 13.64893 |
| C | 5.05750  | 7.01674  | 13.99458 |
| H | 4.34652  | 7.07996  | 14.80991 |
| C | 5.17340  | 5.80605  | 13.29397 |
| C | 5.72522  | 9.42718  | 14.38506 |
| H | 5.40862  | 10.23529 | 13.71697 |
| H | 6.68522  | 9.72690  | 14.81835 |
| H | 4.99829  | 9.36361  | 15.19753 |
| C | 2.91637  | 2.27617  | 14.06638 |
| C | 2.05288  | 1.24546  | 14.52071 |
| H | 2.08405  | 0.30115  | 13.98829 |
| C | 1.20584  | 1.42442  | 15.59562 |
| H | 0.56629  | 0.60195  | 15.90363 |
| C | 1.14659  | 2.64614  | 16.30683 |
| C | 1.97576  | 3.66309  | 15.87936 |
| H | 1.97511  | 4.62451  | 16.38291 |
| C | 2.86219  | 3.52109  | 14.78034 |
| C | 0.21108  | 2.81149  | 17.48074 |
| H | -0.83224 | 2.65689  | 17.18637 |
| H | 0.29155  | 3.81213  | 17.91056 |
| H | 0.43175  | 2.08865  | 18.27321 |

**Table S4.** Cartesian coordinates of the  $[\text{Al}(\text{L1}^{\text{Me4}})_2]$  anion.

|    |          |          |          |
|----|----------|----------|----------|
| Al | 0.00002  | 0.00003  | -0.22933 |
| O  | 0.01644  | 1.35458  | -1.56800 |
| O  | -0.33489 | -1.28276 | 1.09927  |
| N  | -2.01691 | 0.32484  | -0.31200 |
| N  | -2.98543 | -0.22426 | 0.31159  |
| C  | -1.16196 | 1.82801  | -1.89450 |
| C  | -1.32781 | 2.84294  | -2.87678 |
| C  | -2.61108 | 3.28963  | -3.15841 |
| H  | -2.73300 | 4.06606  | -3.91004 |
| C  | -3.76689 | 2.78613  | -2.51695 |
| C  | -3.60609 | 1.79605  | -1.56076 |
| H  | -4.46065 | 1.37902  | -1.04145 |
| C  | -2.32218 | 1.31917  | -1.25024 |
| C  | -5.13180 | 3.32590  | -2.87698 |
| H  | -5.35446 | 3.17885  | -3.93926 |
| H  | -5.20345 | 4.40118  | -2.68078 |
| H  | -5.91580 | 2.82963  | -2.30096 |
| C  | -1.44809 | -1.72033 | 1.60965  |
| C  | -1.39835 | -2.75349 | 2.59611  |
| C  | -2.57193 | -3.22850 | 3.15440  |
| H  | -2.50535 | -4.01549 | 3.90185  |
| C  | -3.85141 | -2.73974 | 2.79837  |
| C  | -3.90576 | -1.74283 | 1.84881  |
| H  | -4.85624 | -1.32578 | 1.53210  |
| C  | -2.73779 | -1.21511 | 1.23922  |
| C  | -5.09432 | -3.30312 | 3.44579  |
| H  | -5.99349 | -2.81727 | 3.06094  |
| H  | -5.07862 | -3.16474 | 4.53211  |
| H  | -5.19043 | -4.37832 | 3.26096  |
| O  | -0.01612 | -1.35523 | -1.56728 |
| O  | 0.33465  | 1.28347  | 1.09872  |

|   |          |          |          |
|---|----------|----------|----------|
| N | 2.01697  | -0.32480 | -0.31143 |
| N | 2.98536  | 0.22457  | 0.31212  |
| C | 1.16236  | -1.82876 | -1.89337 |
| C | 1.32844  | -2.84418 | -2.87512 |
| C | 2.61178  | -3.29089 | -3.15634 |
| H | 2.73387  | -4.06769 | -3.90757 |
| C | 3.76746  | -2.78698 | -2.51497 |
| C | 3.60644  | -1.79646 | -1.55929 |
| H | 4.46089  | -1.37910 | -1.04006 |
| C | 2.32245  | -1.31954 | -1.24917 |
| C | 5.13247  | -3.32679 | -2.87458 |
| H | 5.35529  | -3.18011 | -3.93688 |
| H | 5.20416  | -4.40200 | -2.67799 |
| H | 5.91634  | -2.83025 | -2.29862 |
| C | 1.44773  | 1.72117  | 1.60924  |
| C | 1.39779  | 2.75463  | 2.59537  |
| C | 2.57125  | 3.22981  | 3.15377  |
| H | 2.50451  | 4.01704  | 3.90097  |
| C | 3.85080  | 2.74092  | 2.79819  |
| C | 3.90535  | 1.74370  | 1.84898  |
| H | 4.85589  | 1.32651  | 1.53263  |
| C | 2.73751  | 1.21578  | 1.23931  |
| C | 5.09358  | 3.30452  | 3.44570  |
| H | 5.18975  | 4.37964  | 3.26051  |
| H | 5.99283  | 2.81850  | 3.06123  |
| H | 5.07763  | 3.16651  | 4.53207  |
| C | 0.05115  | 3.29655  | 2.99684  |
| H | -0.47647 | 3.72158  | 2.13746  |
| H | -0.59247 | 2.50456  | 3.39184  |
| H | 0.15466  | 4.07203  | 3.75861  |
| C | 0.11363  | -3.39547 | -3.57340 |
| H | -0.59979 | -3.81520 | -2.85696 |
| H | -0.42120 | -2.61011 | -4.11747 |

|   |          |          |          |
|---|----------|----------|----------|
| H | 0.39130  | -4.17759 | -4.28327 |
| C | -0.05180 | -3.29529 | 2.99801  |
| H | 0.47594  | -3.72070 | 2.13889  |
| H | 0.59180  | -2.50316 | 3.39278  |
| H | -0.15545 | -4.07045 | 3.76009  |
| C | -0.11283 | 3.39378  | -3.57512 |
| H | 0.60034  | 3.81413  | -2.85879 |
| H | 0.42223  | 2.60801  | -4.11839 |
| H | -0.39033 | 4.17532  | -4.28570 |

**Table S5.** Cartesian coordinates of the [Al(L2<sup>Me2</sup>)<sub>2</sub>] anion.

|    |          |          |          |
|----|----------|----------|----------|
| Al | -0.00017 | -0.00090 | -0.25688 |
| O  | 0.06823  | 1.35692  | -1.59666 |
| O  | -0.31257 | -1.29113 | 1.09507  |
| N  | -2.00070 | 0.37115  | -0.35442 |
| C  | -1.09450 | 1.86686  | -1.93283 |
| C  | -1.24253 | 2.88117  | -2.90184 |
| H  | -0.35348 | 3.25626  | -3.39775 |
| C  | -2.49755 | 3.38678  | -3.21505 |
| H  | -2.57968 | 4.16730  | -3.96646 |
| C  | -3.66417 | 2.91698  | -2.58567 |
| C  | -3.52900 | 1.91203  | -1.62801 |
| H  | -4.42246 | 1.54212  | -1.13584 |
| C  | -2.27428 | 1.38519  | -1.29818 |
| C  | -5.01675 | 3.49985  | -2.92745 |
| H  | -5.18734 | 3.51201  | -4.00860 |
| H  | -5.11134 | 4.53361  | -2.57613 |
| H  | -5.82364 | 2.92262  | -2.46992 |
| C  | -1.40319 | -1.75325 | 1.62988  |
| C  | -1.33023 | -2.77928 | 2.60929  |
| H  | -0.34575 | -3.14906 | 2.87474  |
| C  | -2.46379 | -3.29302 | 3.20814  |
| H  | -2.35569 | -4.07731 | 3.95261  |
| C  | -3.75871 | -2.83044 | 2.88171  |
| C  | -3.84683 | -1.83227 | 1.92897  |
| H  | -4.82432 | -1.44770 | 1.64870  |
| C  | -2.71050 | -1.27655 | 1.28981  |
| C  | -4.98056 | -3.41154 | 3.55339  |
| H  | -5.89445 | -2.93967 | 3.18568  |
| H  | -4.94723 | -3.27142 | 4.63907  |
| H  | -5.06547 | -4.48814 | 3.37136  |
| O  | -0.06998 | -1.36495 | -1.59007 |

|   |          |          |          |
|---|----------|----------|----------|
| O | 0.31378  | 1.29593  | 1.08834  |
| N | 2.00007  | -0.37466 | -0.35362 |
| C | 1.09203  | -1.87869 | -1.92299 |
| C | 1.23876  | -2.89891 | -2.88594 |
| H | 0.34927  | -3.27567 | -3.37979 |
| C | 2.49316  | -3.40797 | -3.19612 |
| H | 2.57433  | -4.19294 | -3.94299 |
| C | 3.66034  | -2.93602 | -2.56945 |
| C | 3.52645  | -1.92515 | -1.61783 |
| H | 4.42039  | -1.55347 | -1.12783 |
| C | 2.27243  | -1.39471 | -1.29124 |
| C | 5.01206  | -3.52363 | -2.90651 |
| H | 5.17742  | -3.55616 | -3.98799 |
| H | 5.10970  | -4.55043 | -2.53599 |
| H | 5.82040  | -2.93693 | -2.46379 |
| C | 1.40504  | 1.76030  | 1.62000  |
| C | 1.33326  | 2.79108  | 2.59448  |
| H | 0.34913  | 3.16250  | 2.85897  |
| C | 2.46749  | 3.30719  | 3.19004  |
| H | 2.36027  | 4.09506  | 3.93085  |
| C | 3.76197  | 2.84250  | 2.86486  |
| C | 3.84894  | 1.83972  | 1.91687  |
| H | 4.82604  | 1.45327  | 1.63783  |
| C | 2.71189  | 1.28145  | 1.28121  |
| C | 4.98457  | 3.42626  | 3.53285  |
| H | 5.06990  | 4.50191  | 3.34551  |
| H | 5.89797  | 2.95214  | 3.16681  |
| H | 4.95193  | 3.29145  | 4.61922  |
| C | -2.92769 | -0.24097 | 0.32095  |
| H | -3.97135 | 0.03185  | 0.15971  |
| C | 2.92788  | 0.24063  | 0.31773  |
| H | 3.97126  | -0.03371 | 0.15731  |

**Table S6.** Cartesian coordinates of the neutral [Al(L1<sup>Me2</sup>)<sub>2</sub>] complex.

|    |          |          |          |
|----|----------|----------|----------|
| Al | -0.00000 | -0.00001 | -0.19549 |
| O  | 0.07972  | 1.36923  | -1.52516 |
| O  | -0.38056 | -1.28381 | 1.10435  |
| N  | -1.99154 | 0.39020  | -0.30295 |
| N  | -2.99240 | -0.12751 | 0.31626  |
| C  | -1.06115 | 1.87751  | -1.85548 |
| C  | -1.19961 | 2.92209  | -2.80687 |
| H  | -0.30295 | 3.31106  | -3.27330 |
| C  | -2.44852 | 3.40022  | -3.12243 |
| H  | -2.54114 | 4.19146  | -3.86021 |
| C  | -3.63396 | 2.89532  | -2.51546 |
| C  | -3.51974 | 1.88785  | -1.57431 |
| H  | -4.39168 | 1.47728  | -1.08120 |
| C  | -2.25809 | 1.37767  | -1.23576 |
| C  | -4.97394 | 3.46371  | -2.90500 |
| H  | -5.16883 | 3.32250  | -3.97350 |
| H  | -5.01976 | 4.54060  | -2.71093 |
| H  | -5.78399 | 2.98743  | -2.35035 |
| C  | -1.50273 | -1.68736 | 1.59099  |
| C  | -1.51409 | -2.74510 | 2.54189  |
| H  | -0.55661 | -3.17710 | 2.80674  |
| C  | -2.68370 | -3.18866 | 3.10582  |
| H  | -2.64611 | -3.99361 | 3.83404  |
| C  | -3.94733 | -2.62891 | 2.76798  |
| C  | -3.96480 | -1.61443 | 1.84140  |
| H  | -4.89598 | -1.15108 | 1.53534  |
| C  | -2.78247 | -1.11727 | 1.22901  |
| C  | -5.20565 | -3.14989 | 3.41421  |
| H  | -6.08766 | -2.62453 | 3.04378  |
| H  | -5.17444 | -3.02727 | 4.50198  |
| H  | -5.34273 | -4.21786 | 3.21477  |

|   |          |          |          |
|---|----------|----------|----------|
| O | -0.07970 | -1.36923 | -1.52517 |
| O | 0.38055  | 1.28379  | 1.10436  |
| N | 1.99154  | -0.39021 | -0.30294 |
| N | 2.99239  | 0.12751  | 0.31627  |
| C | 1.06117  | -1.87751 | -1.85548 |
| C | 1.19965  | -2.92209 | -2.80687 |
| H | 0.30299  | -3.31106 | -3.27330 |
| C | 2.44856  | -3.40022 | -3.12242 |
| H | 2.54119  | -4.19147 | -3.86019 |
| C | 3.63399  | -2.89533 | -2.51543 |
| C | 3.51975  | -1.88785 | -1.57428 |
| H | 4.39168  | -1.47728 | -1.08116 |
| C | 2.25810  | -1.37768 | -1.23574 |
| C | 4.97398  | -3.46371 | -2.90496 |
| H | 5.16888  | -3.32246 | -3.97345 |
| H | 5.01978  | -4.54060 | -2.71093 |
| H | 5.78401  | -2.98745 | -2.35028 |
| C | 1.50272  | 1.68735  | 1.59100  |
| C | 1.51406  | 2.74510  | 2.54190  |
| H | 0.55658  | 3.17709  | 2.80675  |
| C | 2.68366  | 3.18867  | 3.10583  |
| H | 2.64607  | 3.99362  | 3.83404  |
| C | 3.94730  | 2.62893  | 2.76799  |
| C | 3.96478  | 1.61444  | 1.84141  |
| H | 4.89597  | 1.15110  | 1.53536  |
| C | 2.78246  | 1.11727  | 1.22903  |
| C | 5.20561  | 3.14992  | 3.41423  |
| H | 5.34267  | 4.21789  | 3.21481  |
| H | 6.08763  | 2.62458  | 3.04377  |
| H | 5.17442  | 3.02727  | 4.50199  |



**Table S7.** Cartesian coordinates of the [Al(L2<sup>Me2</sup>)<sub>2</sub>] anion.

|    |          |          |          |
|----|----------|----------|----------|
| Al | 0.00000  | -0.27358 | -0.00003 |
| O  | 0.02213  | -1.67543 | 1.30736  |
| O  | 0.23069  | 1.02977  | -1.31761 |
| N  | 2.01033  | -0.37052 | 0.27659  |
| C  | 1.19087  | -2.02243 | 1.73322  |
| C  | 1.38841  | -3.06038 | 2.67896  |
| H  | 0.51564  | -3.58673 | 3.04541  |
| C  | 2.65649  | -3.36351 | 3.11809  |
| H  | 2.79253  | -4.15208 | 3.85165  |
| C  | 3.79761  | -2.67335 | 2.63888  |
| C  | 3.62217  | -1.66585 | 1.69691  |
| H  | 4.49678  | -1.14343 | 1.32619  |
| C  | 2.34651  | -1.32940 | 1.23111  |
| C  | 5.16786  | -3.03828 | 3.14958  |
| H  | 5.39538  | -4.09211 | 2.95752  |
| H  | 5.24085  | -2.88743 | 4.23194  |
| H  | 5.94553  | -2.43650 | 2.67556  |
| C  | 1.27486  | 1.64326  | -1.76415 |
| C  | 1.12367  | 2.66302  | -2.74350 |
| H  | 0.11608  | 2.88742  | -3.07210 |
| C  | 2.20983  | 3.32968  | -3.25628 |
| H  | 2.04966  | 4.09845  | -4.00705 |
| C  | 3.53735  | 3.04869  | -2.83904 |
| C  | 3.70406  | 2.06993  | -1.88670 |
| H  | 4.70459  | 1.82711  | -1.53865 |
| C  | 2.61402  | 1.35158  | -1.32611 |
| C  | 4.70019  | 3.80628  | -3.42980 |
| H  | 5.64832  | 3.47414  | -3.00195 |
| H  | 4.61098  | 4.88231  | -3.24689 |
| H  | 4.75785  | 3.66798  | -4.51461 |
| O  | -0.02226 | -1.67544 | -1.30744 |

|   |          |          |          |
|---|----------|----------|----------|
| O | -0.23059 | 1.02983  | 1.31751  |
| N | -2.01035 | -0.37039 | -0.27662 |
| C | -1.19103 | -2.02237 | -1.73326 |
| C | -1.38868 | -3.06033 | -2.67896 |
| H | -0.51595 | -3.58675 | -3.04542 |
| C | -2.65678 | -3.36338 | -3.11806 |
| H | -2.79290 | -4.15196 | -3.85160 |
| C | -3.79785 | -2.67312 | -2.63884 |
| C | -3.62231 | -1.66562 | -1.69690 |
| H | -4.49688 | -1.14314 | -1.32616 |
| C | -2.34662 | -1.32924 | -1.23113 |
| C | -5.16812 | -3.03791 | -3.14956 |
| H | -5.39547 | -4.09189 | -2.95811 |
| H | -5.24129 | -2.88641 | -4.23182 |
| H | -5.94580 | -2.43651 | -2.67507 |
| C | -1.27471 | 1.64335  | 1.76411  |
| C | -1.12345 | 2.66309  | 2.74346  |
| H | -0.11583 | 2.88745  | 3.07202  |
| C | -2.20956 | 3.32979  | 3.25628  |
| H | -2.04933 | 4.09856  | 4.00705  |
| C | -3.53710 | 3.04886  | 2.83910  |
| C | -3.70389 | 2.07011  | 1.88675  |
| H | -4.70445 | 1.82734  | 1.53875  |
| C | -2.61390 | 1.35172  | 1.32612  |
| C | -4.69990 | 3.80646  | 3.42994  |
| H | -4.75777 | 3.66777  | 4.51469  |
| H | -5.64802 | 3.47466  | 3.00180  |
| H | -4.61044 | 4.88254  | 3.24744  |
| C | 2.89731  | 0.36678  | -0.34265 |
| H | 3.95223  | 0.23282  | -0.10177 |
| C | -2.89728 | 0.36695  | 0.34266  |
| H | -3.95221 | 0.23304  | 0.10182  |
